# Supplementary material for: Health-related quality of life measures in incarcerated populations: protocol for a scoping review
Source: HighWire-hosted journal article supplement (doi:10.1136/bmjopen-2021-052800), 2022-04-01
Supplement: bmjopen-2021-052800supp001_data_supplement.pdf [file bmjopen-2021-052800supp001_data_supplement.pdf]

## Supplementary Appendix 1

### Eligibility Criteria

| PICO         | Inclusion Criteria                                                                                                                                                                                                                                                                                                                                                                                                                | Exclusion Criteria                                                                                                                                                                                                                                                                                                                                                           |
|--------------|-----------------------------------------------------------------------------------------------------------------------------------------------------------------------------------------------------------------------------------------------------------------------------------------------------------------------------------------------------------------------------------------------------------------------------------|------------------------------------------------------------------------------------------------------------------------------------------------------------------------------------------------------------------------------------------------------------------------------------------------------------------------------------------------------------------------------|
| Population   | <ul style="list-style-type: none"> <li>● Incarcerated population which are individuals in detention in prisons who are serving sentences for more than a year with no restrictions regarding age, gender or ethnicity</li> </ul>                                                                                                                                                                                                  | <ul style="list-style-type: none"> <li>● Arrested individuals who stay in police custody</li> <li>● Prisoners of War</li> <li>● Persons from concentration camps</li> <li>● Immigration detainees</li> <li>● Prisoners in psychiatric units</li> <li>● Those awaiting trial, sentencing, or transfer to prison,</li> <li>● Local jails</li> <li>● Home detentions</li> </ul> |
| Intervention | <ul style="list-style-type: none"> <li>● Any form of health-related quality of life measurement including but not limited to:               <ul style="list-style-type: none"> <li>● Physical functioning</li> <li>● SF-6D</li> <li>● SF-36</li> <li>● EQ-5D</li> <li>● 15D</li> <li>● QWB</li> <li>● QWB-SA</li> <li>● AQoL-4D</li> <li>● AQoL-6D</li> </ul> </li> <li>● Any form of health state utility measurement</li> </ul> |                                                                                                                                                                                                                                                                                                                                                                              |

|            |                                                                                                                                                                                                                                                                                   |                                                                                |
|------------|-----------------------------------------------------------------------------------------------------------------------------------------------------------------------------------------------------------------------------------------------------------------------------------|--------------------------------------------------------------------------------|
| Comparison | No comparison group                                                                                                                                                                                                                                                               |                                                                                |
| Outcomes   | <ul style="list-style-type: none"><li>• Health-related quality of life value</li><li>• Health state utility score<ul style="list-style-type: none"><li>• Health utility index</li></ul></li><li>• Quality-adjusted life year</li><li>• Quality-adjusted life expectancy</li></ul> | <ul style="list-style-type: none"><li>• Exclude non-English articles</li></ul> |
