# Supplementary material for: Health-related quality of life measures in incarcerated populations: protocol for a scoping review
Source: HighWire-hosted journal article supplement (doi:10.1136/bmjopen-2021-052800), 2022-04-01
Supplement: bmjopen-2021-052800supp002_data_supplement.pdf [file bmjopen-2021-052800supp002_data_supplement.pdf]

## Supplementary Appendix 2

### OVID Medline Search

|                                                                                                                                                                                                                                                                                                                             |
|-----------------------------------------------------------------------------------------------------------------------------------------------------------------------------------------------------------------------------------------------------------------------------------------------------------------------------|
| 1. (SF-6D or sf6d or "sf 6d").ti,ab,kf.                                                                                                                                                                                                                                                                                     |
| 2. (euro\$ adj3 (5 d or 5d or 5 dimension\$ or 5dimension\$ or 5 domain\$ or 5domain\$)).ti,ab,kf.                                                                                                                                                                                                                          |
| 3. Quality-Adjusted Life Years/                                                                                                                                                                                                                                                                                             |
| 4. (quality adjusted or adjusted life year\$).ti,ab,kf.                                                                                                                                                                                                                                                                     |
| 5. (qaly\$ or qald\$ or qale\$ or qtime\$).ti,ab,kf.                                                                                                                                                                                                                                                                        |
| 6. (illness state\$1 or health state\$1).ti,ab,kf.                                                                                                                                                                                                                                                                          |
| 7. (hui or hui1 or hui2 or hui3).ti,ab,kf.                                                                                                                                                                                                                                                                                  |
| 8. (multiattribute\$ or multi attribute\$).ti,ab,kf.                                                                                                                                                                                                                                                                        |
| 9. (utility adj3 (score\$1 or valu\$ or health\$ or cost\$ or measur\$ or disease\$ or mean or gain or gains or index\$)).ti,ab,kf.                                                                                                                                                                                         |
| 10. utilities.ti,ab,kf.                                                                                                                                                                                                                                                                                                     |
| 11. (eq-5d or eq5d or eq-5 or eq5 or euro qual or euroqual or euro qual5d or euroqual5d or euro qol or euroqol or euro qol5d or euroqol5d or euro quol or euroquol or euro quol5d or euroquol5d or eur qol or eurqol or eur qol5d or eur qol5d or eur?qul or eur?qul5d or euro\$ quality of life or european qol).ti,ab,kf. |
| 12. (euro\$ adj3 (5 d or 5d or 5 dimension\$ or 5dimension\$ or 5 domain\$ or 5domain\$)).ti,ab,kf.                                                                                                                                                                                                                         |
| 13. (sf36\$ or sf 36\$ or sf thirtysix or sf thirty six).ti,ab,kf.                                                                                                                                                                                                                                                          |
| 14. (time trade off\$1 or time tradeoff\$1 or tto or timetradeoff\$1).ti,ab,kf.                                                                                                                                                                                                                                             |
| 15. quality of life/ and ((quality of life or qol) adj (score\$1 or measure\$1)).ti,ab,kf.                                                                                                                                                                                                                                  |

|                                                                                                                                                                                                                          |
|--------------------------------------------------------------------------------------------------------------------------------------------------------------------------------------------------------------------------|
| 16. quality of life/ and ec.fs.                                                                                                                                                                                          |
| 17. quality of life/ and (health adj3 status).ti,ab,kf.                                                                                                                                                                  |
| 18. (quality of life or qol).ti,ab. and Cost-Benefit Analysis/                                                                                                                                                           |
| 19. (quality of well being" or "quality of wellbeing" or "quality of well-being" or "QWB").ti,ab,kf.<br>20. ("Quality of Well Being Self-Administered" or "Quality of Well-Being Self-Administered" or QWB-SA).ti,ab,kf. |
| 21. ("Assessment of Quality of Life" or AQoL).ti,ab,kf.                                                                                                                                                                  |
| 22. (15D or 15-D or 15-dimensional or "15 dimensional").ti,ab,kf.                                                                                                                                                        |
| 23. (Prison* or "Prison Population" or Incarcerat* or Convict* or Inmate* or Detention* or Offender* or Criminal* or Imprison* or Jail* or Detainee*).ti,ab,kf.                                                          |
| 24. 1 or 2 or 3 or 4 or 5 or 6 or 7 or 8 or 9 or 10 or 11 or 12 or 13 or 14 or 15 or 16 or 17 or 18 or 19 or 20 or 21 or 22                                                                                              |
| 25. 23 and 24                                                                                                                                                                                                            |
