# Supplementary material for: Health-related quality of life measures in incarcerated populations: protocol for a scoping review
Source: HighWire-hosted journal article supplement (doi:10.1136/bmjopen-2021-052800), 2022-04-01
Supplement: bmjopen-2021-052800supp003_data_supplement.pdf [file bmjopen-2021-052800supp003_data_supplement.pdf]

## Supplementary Appendix 3

| <b>Study identifiers</b>                                                                                                                                           | <b>Study participant characteristics</b>                                                                                                                                                                                                                                     | <b>Method of elicitation of HRQoL values and HSUVs</b>                                                                                                                                    | <b>Description of results and findings of the study:</b>                                                                                                                                                                                                                                                              |
|--------------------------------------------------------------------------------------------------------------------------------------------------------------------|------------------------------------------------------------------------------------------------------------------------------------------------------------------------------------------------------------------------------------------------------------------------------|-------------------------------------------------------------------------------------------------------------------------------------------------------------------------------------------|-----------------------------------------------------------------------------------------------------------------------------------------------------------------------------------------------------------------------------------------------------------------------------------------------------------------------|
| ID:<br>Author:<br>Article title:<br>Year:<br>Country of respondents:<br>Conflict of interest:<br>Funding source:<br>Study design:<br>Exclusions:<br>Study setting: | Sample size:<br>Sampling strategy and rationalization:<br>Recruitment strategies:<br>Inclusion and exclusion criteria:<br>Description of intervention and comparator (when applicable):<br>Age:<br>Sex:<br>Race:<br>Socioeconomic status:<br>Diagnosis:<br>Disease severity: | Instruments used:<br>Mode of administration:<br>Direct or indirect measurement of HSUVs:<br>Self-reported or by a proxy (eg. prison staff or healthcare provider):<br>Follow-up duration: | HRQoL or HSUV value for the health states reported:<br>Are disaggregated values for HRQoL or HSUV measures present:<br>Response rates: Reasons for missing data:<br>Summary of findings:<br>Limitations of the study identified by authors of the study:<br>Limitations of the study identified by our research team: |
